# Supplementary material for: Impact of Long-Term Nutrient Supply Options on Soil Aggregate Stability after Nineteen Years of Rice–Wheat Cropping System
Source: MDPI journal article supplement (doi:10.3390/land11091465), 2022-09-02
Supplement: s1 [file s1]

**Supplementary Table S1: Annual average weather data recorded at ICAR-IIFSR agrometeorology observatory during 2006-2017, data represent mean  $\pm$  SD (average/annual), Kurtosis and Skewness test.**

| Parameter                     | Mean $\pm$ SD       | Kurtosis | Skewness |
|-------------------------------|---------------------|----------|----------|
| ----- 2006 year -----         |                     |          |          |
| Mean Max Temp. (°C)           | 31.24 $\pm$ 5.76    | -0.18    | -0.76    |
| Mean Min Temp. (°C)           | 17.54 $\pm$ 8.10    | -1.33    | 0.03     |
| Annual Rainfall (mm)          | 565.90 $\pm$ 64.44  | 3.70     | 1.77     |
| Mean Relative Humidity (%)    | 62.16 $\pm$ 10.09   | 1.24     | -1.33    |
| Mean Sunshine hours (per day) | 7.11 $\pm$ 0.92     | -1.35    | -0.06    |
| ----- 2007 year -----         |                     |          |          |
| Mean Max Temp. (°C)           | 30.69 $\pm$ 6.73    | -1.46    | -0.34    |
| Mean Min Temp. (°C)           | 16.71 $\pm$ 6.79    | -1.38    | -0.26    |
| Annual Rainfall (mm)          | 563.00 $\pm$ 56.42  | 2.30     | 1.43     |
| Mean Relative Humidity (%)    | 70.51 $\pm$ 6.49    | -0.34    | -0.85    |
| Mean Sunshine hours (per day) | 6.59 $\pm$ 1.42     | -1.22    | 0.58     |
| ----- 2008 year -----         |                     |          |          |
| Mean Max Temp. (°C)           | 31.15 $\pm$ 5.56    | -0.99    | -0.76    |
| Mean Min Temp. (°C)           | 17.30 $\pm$ 7.11    | -1.48    | -0.43    |
| Annual Rainfall (mm)          | 540.20 $\pm$ 64.43  | 0.13     | 1.33     |
| Mean Relative Humidity (%)    | 67.22 $\pm$ 13.44   | 0.30     | -0.91    |
| Mean Sunshine hours (per day) | 6.10 $\pm$ 1.68     | -0.19    | 0.72     |
| ----- 2009 year -----         |                     |          |          |
| Mean Max Temp. (°C)           | 31.64 $\pm$ 6.66    | -0.90    | -0.25    |
| Mean Min Temp. (°C)           | 16.56 $\pm$ 7.85    | -1.80    | -0.19    |
| Annual Rainfall (mm)          | 249.80 $\pm$ 29.59  | -0.29    | 1.22     |
| Mean Relative Humidity (%)    | 69.24 $\pm$ 15.49   | -0.48    | -1.10    |
| Mean Sunshine hours (per day) | 6.48 $\pm$ 1.54     | -1.45    | 0.18     |
| ----- 2010 year -----         |                     |          |          |
| Mean Max Temp. (°C)           | 32.24 $\pm$ 7.06    | 0.07     | -0.51    |
| Mean Min Temp. (°C)           | 16.71 $\pm$ 7.86    | -1.19    | -0.66    |
| Annual Rainfall (mm)          | 739.40 $\pm$ 110.30 | 1.24     | 1.60     |
| Mean Relative Humidity (%)    | 62.10 $\pm$ 13.96   | -0.74    | -0.85    |
| Mean Sunshine hours (per day) | 5.91 $\pm$ 1.91     | -1.29    | 0.12     |
| ----- 2011 year -----         |                     |          |          |
| Mean Max Temp. (°C)           | 30.16 $\pm$ 5.83    | -0.82    | -0.49    |
| Mean Min Temp. (°C)           | 16.66 $\pm$ 8.35    | -1.47    | -0.42    |
| Annual Rainfall (mm)          | 697.30 $\pm$ 85.04  | 0.13     | 1.35     |
| Mean Relative Humidity (%)    | 72.64 $\pm$ 8.70    | 0.56     | -0.48    |
| Mean Sunshine hours (per day) | 5.99 $\pm$ 1.87     | -0.91    | -0.03    |
| ----- 2012 year -----         |                     |          |          |

|                               |                  |       |       |
|-------------------------------|------------------|-------|-------|
| Mean Max Temp. (°C)           | 30.44 ± 7.26     | -0.87 | -0.33 |
| Mean Min Temp. (°C)           | 15.70 ± 8.05     | -1.85 | -0.09 |
| Annual Rainfall (mm)          | 808.40 ± 176.07  | 11.61 | 3.39  |
| Mean Relative Humidity (%)    | 71.60 ± 8.65     | -0.08 | -0.69 |
| Mean Sunshine hours (per day) | 6.08 ± 1.55      | -1.14 | -0.17 |
| ----- 2013 year -----         |                  |       |       |
| Mean Max Temp. (°C)           | 29.83 ± 6.61     | -0.49 | -0.55 |
| Mean Min Temp. (°C)           | 16.24 ± 7.24     | -1.57 | -0.22 |
| Annual Rainfall (mm)          | 1012.20 ± 108.90 | 0.30  | 1.30  |
| Mean Relative Humidity (%)    | 72.88 ± 11.70    | 0.81  | -1.19 |
| Mean Sunshine hours (per day) | 6.19 ± 1.87      | -0.68 | 0.58  |
| ----- 2014 year -----         |                  |       |       |
| Mean Max Temp. (°C)           | 30.01 ± 7.05     | -1.04 | -0.53 |
| Mean Min Temp. (°C)           | 16.69 ± 7.83     | -1.72 | -0.21 |
| Annual Rainfall (mm)          | 460.50 ± 28.54   | -1.54 | 0.10  |
| Mean Relative Humidity (%)    | 71.16 ± 9.21     | -1.24 | -0.74 |
| Mean Sunshine hours (per day) | 6.60 ± 1.71      | 0.15  | -0.47 |
| ----- 2015 year -----         |                  |       |       |
| Mean Max Temp. (°C)           | 30.02 ± 6.67     | 0.07  | -0.77 |
| Mean Min Temp. (°C)           | 17.61 ± 7.16     | -1.59 | -0.34 |
| Annual Rainfall (mm)          | 710.10 ± 67.73   | 5.44  | 2.11  |
| Mean Relative Humidity (%)    | 75.50 ± 7.86     | 0.32  | -0.32 |
| Mean Sunshine hours (per day) | 6.45 ± 1.84      | -0.04 | -0.47 |
| ----- 2016 year -----         |                  |       |       |
| Mean Max Temp. (°C)           | 31.25 ± 5.80     | -0.75 | -0.64 |
| Mean Min Temp. (°C)           | 17.32 ± 7.25     | -1.76 | -0.31 |
| Annual Rainfall (mm)          | 665.10 ± 94.75   | 2.91  | 1.95  |
| Mean Relative Humidity (%)    | 73.35 ± 10.82    | 1.97  | -1.21 |
| Mean Sunshine hours (per day) | 6.25 ± 1.82      | -0.72 | -0.17 |
| ----- 2017 year -----         |                  |       |       |
| Mean Max Temp. (°C)           | 30.69 ± 6.01     | -1.20 | -0.39 |
| Mean Min Temp. (°C)           | 18.11 ± 7.94     | -1.21 | 0.10  |
| Annual Rainfall (mm)          | 730.30 ± 81.16   | 0.71  | 1.39  |
| Mean Relative Humidity (%)    | 73.03 ± 8.79     | -0.05 | -0.73 |
| Mean Sunshine hours (per day) | 6.52 ± 1.62      | -0.60 | -0.02 |
